# Supplementary material for: The first NH aldimine organometallic compound. Isolation and crystal structureElectronic supplementary information (ESI) available: experimental section. See http://www.rsc.org/suppdata/cc/b2/b211808d/
Source: Royal Society of Chemistry journal article supplement (doi:10.1039/b211808d), 2003-01-20
Supplement: b211808d.doc [file b211808d.doc]

**Title:** The first NH aldimine organometallic compound. Isolation and crystal structure

**Authors**: Joan Albert, J. Magali Cadena, Asensio González, Jaume Granell, Xavier Solans, Mercè Font-Bardia

**Experimental Section**

1H NMR spectra at 200 MHz were recorded on a Varian Gemini 200 spectrometer and 1H NMR at 500 MHz and 31P{1H} at 101.26 MHz were recorded, respectively, on a Varian VXR 500 or a Bruker DRX 250 spectrometers. Chemical shifts (in ppm) were measured relative to SiMe4 for 1H and to 85% H3PO4 for 31P. The aromatic protons of the metallated ring are labelled H1,H2,H3 and H4, being H1 the proton adjacent to the Pd-C bond. Microanalyses were performed at the Institute de Química Bio-Orgànica de Barcelona and the Serveis Científico-Tècnics de la Universitat de Barcelona. Infrared spectra were recorded as KBr disks on a Nicolet 520 FT-IR spectrometer. Mass spectra were recorded on a Fisons VG-Quattro spectrometer. The samples were introduced in a matrix of 2-nitrobenzylalcohol for FAB analysis and then bombarded with cesium atoms.

**Cyclometallation reaction**

A suspension formed of 2,4,6-Me3C6H2CH=NCH(CH2Ph)COOEt (719 mg, 2.22 mmol) and palladium acetate (500 mg, 2.22 mmol) in 30 mL of toluene was stirred at room temperature for 1 hour, and the resulting solution was concentrated in vacuo. The solid obtained was treated with an excess of LiCl (3.5 mmol, 150 mg) in 30 mL of acetone for 30 min at room temperature. The resulting solution was concentrated in vacuo and the solid obtained was eluted by SiO2 column chromatography with CHCl3:MeOH 100:1 as eluent to obtain **1** in 15% yield (156 mg) in the first colored band. A mixture of compounds was obtained in the second colored band.

**Synthesis of monomers with PPh3**

A stirred suspension of **1** (0.21 mmol, 200 mg) in 30 mL of acetone was treated with PPh3 (0.43 mmol, 112.9 mg) for 30 min at room temperature. The solution was concentrated in vacuo and the solid obtained was washed with diethyl ether to afford **2** as a yellow solid in a yield of 85%.

Characterization data for **2**: elemental analysis calcd. for C39H39ClNO2PPd: C, 64,47, H, 5.41, N, 1.93; found: C 64.3, H 5.4, N 1.9; 1H NMR (400 MHz, CDCl3, selected data)  = 1.21 (br t, JHH = 6.8 Hz, 3H, C*H3*CH2); 2.22 (s, 6H, *Me*); 2.24 (s, 3H, *Me*); 3.28 (br, 1H, *HC*CH2); 3.89 (br, 2H, C*H2*CH); 4.08 (br, 2H, C*H2*CH3); 6.32 (t, 3JHH = 7.2 Hz, 1H, *H2*); 6.56 (dd, 3JHH = 5.2 Hz, 4JHP = 7.6 Hz, 1H, *H1*); 6.68 (m, 2H, *H3*, *aromatic*); 6.78 (m, 2H, *H4, aromatic*); 7.26-7.63 (m, 15H, *aromatic*); 9.35 (br s, 1H, *H*C=N). 31P{1H} NMR (101.26 MHz, CDCl3)  = 33.60.

A stirred suspension of the mixture of products obtained in the metallation (250 mg) in 30 mL of acetone was treated with PPh3 (0.5 mmol,141 mg) for 30 min at room temperature. The solution was concentrated in vacuo, and the solid obtained was washed with diethyl ether to afford a yellow solid. This solid was carefully eluted in a SiO2 column with CHCl3:acetone 100:2 as eluent to obtain **3**, **4** and **5**, in a yield of 20% (320 mg), 25% (400 mg) and 15% (180 mg) respectively.

Characterization data for **3**: elemental analysis calcd. for C39H39ClNO2PPd: C, 64,47, H, 5.41, N, 1.93; found: C 64.2, H 5.5, N 1.9; 1H NMR (400 MHz, CDCl3 selected data, mixture of rotamers)  = 1.19 (br, 3H, *CH3*CH2O); 1.42 (br, 3H, *CH3*CH2O); 4.15 (br, 1H, *H*CCOOEt);4.92 (br, 1H, *H*CCOOEt); 8.74 (m, 2H, *H*C=N). 31P{1H} NMR (101.26 MHz, CDCl3)  = 33.55 s and 33.70 s.

Characterization data for **4**: elemental analysis calcd. for C39H39ClNO2PPd: C, 64,47, H, 5.41, N, 1.93; found: C 64.5, H 5.6, N 1.8: 1H NMR (500 MHz, CDCl3, selected data) = 1.23 (t, JHH = 5.0 Hz, 3H, C*H3*CH2); 2.04 (s, 3H, *Me*); 2.19 (s, 3H, *Me*); 2.40 (m, 2H, *CH2*Pd); 3.45 (m, 2H, *CH2*Ph); 4.10 (q, JHH = 5.0 Hz, 2H, C*H2*CH3); 5.58 (s, 1H, *aromatic*); 6.09 (m, 1H; *H*CCOOEt); 6.58 (s, 1H, *aromatic*); 7.40-7.80 (m, 20H, *aromatic*); 8.28 (d, 1H, 4JHP = 13.2 Hz, *H*C=N). 31P{1H} NMR (101.26 MHz, CDCl3)  = 35.42 s

Characterization data for **5**: elemental analysis calcd. for C28H27ClNPPd: C, 61.11, H, 4.94, N, 2.55; found: C 61.1, H 4.9, N 2.6; 1H NMR (400 MHz, CDCl3)  = 2.15 (s, 3H, *Me*); 2.36 (s, 3H, *Me*); 2.81 (d, 2H, 3JHP = 5.6 Hz, *CH2*Pd); 6.08 (s, 1H, *aromatic*); 6.74 (s, 1H, *aromatic*); 7.39-7.42 (m, 5H, *aromatic*); 7.63-7.70 (m, 10H, *aromatic*); 8.49 (t, 1H, 4JHP = 13.2 Hz, 3JHH = 13.2 Hz, *H*C=N); 9.22 (br d, 1H, 3JHH = 13.2 Hz, *H*N). 31P{1H} NMR (101.26 MHz, CDCl3)  = 34.19 s
